# Supplementary material for: Laser induced breakdown spectroscopy for quantification of sodium and potassium in minced beef: a potential technique for detecting beef kidney adulteration
Source: Royal Society of Chemistry journal article supplement (doi:10.1039/c7ay00757d), 2017-01-01
Supplement: c7ay00757d1.pdf [file c7ay00757d1.pdf]

Electronic supplementary information

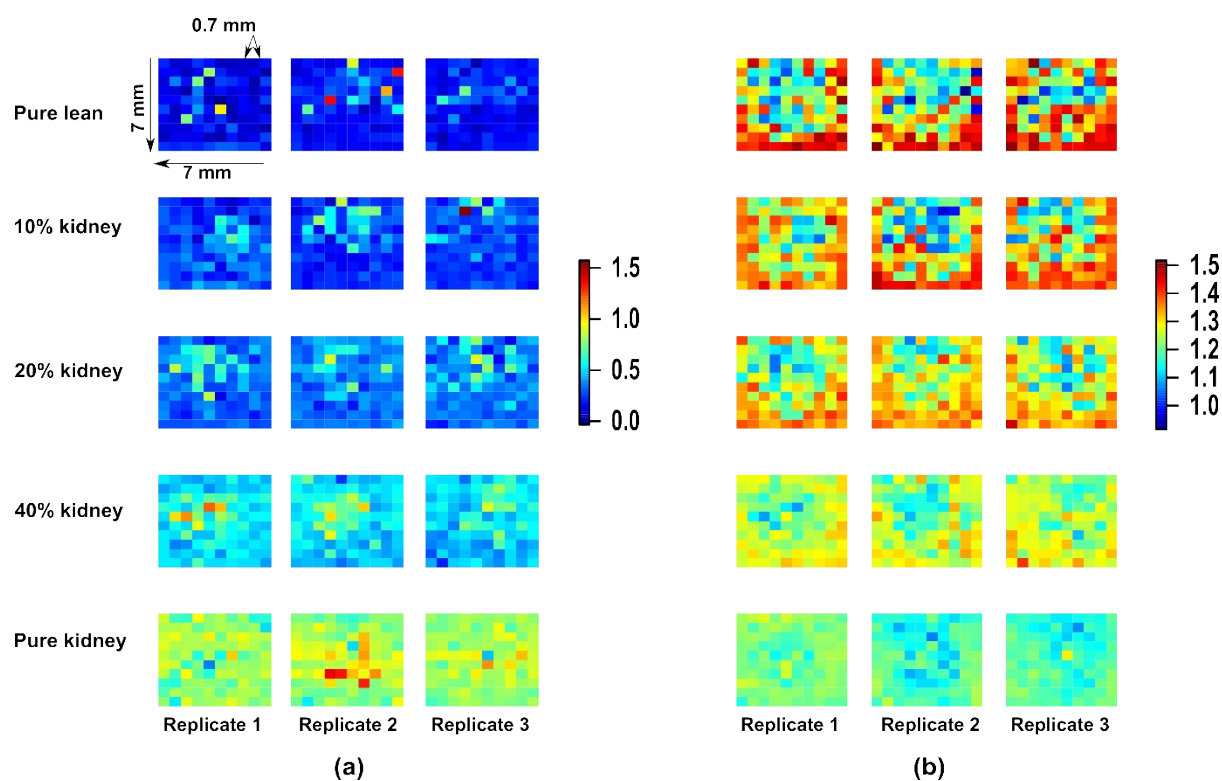

**Fig. 1. Spatial mapping distribution of predicted mineral content of batch 1 pellets in triplicates (dried and compressed): (a) Na and (b) K. Each map is related to a different sample. The colour scale indicates the content of Na or K in g/100g DM.**

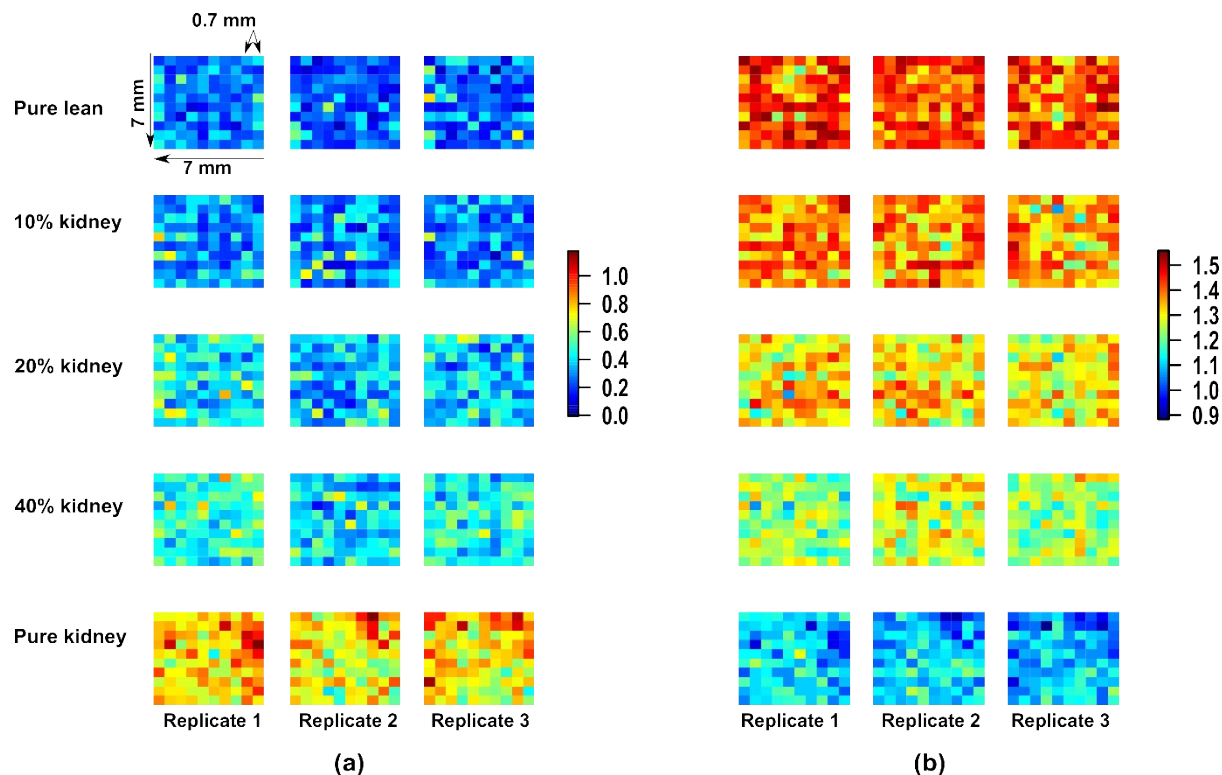

**Figure 2 Spatial mapping distribution of predicted mineral content of batch 2 pellets in triplicates (dried and compressed): (a) Na and (b) K. Each map is related to a different sample. The colour scale indicates the content of Na or K in g/100g DM.**
